# Supplementary material for: Electrogenerated chemiluminescence and interfacial charge transfer dynamics of poly(3-hexylthiophene-2,5-diyl) (P3HT)–TiO2 nanoparticle thin film
Source: Royal Society of Chemistry journal article supplement (doi:10.1039/c2cp43680a), 2013-01-01

## Supplementary Information for Publication

### Electrogenerated Chemiluminescence and Interfacial Charge Transfer Dynamics of Poly (3-hexylthiophene-2, 5-diyl) (P3HT)-TiO<sub>2</sub> Nanoparticle Thin Film

Hongwei Geng,<sup>‡<sup>a</sup></sup> Caleb M. Hill,<sup>‡<sup>a</sup></sup> Shanlin Pan<sup>a\*</sup> and Libai Huang<sup>b</sup>

<sup>a</sup> Department of Chemistry, The University of Alabama, Tuscaloosa, Alabama 35487

<sup>b</sup> Radiation Laboratory, University of Notre Dame, Notre Dame, Indiana 46556

**Figure S1.** ECL experiment geometry. Counter and QRE electrodes were Pt and Ag wires, respectively. Scan rate: 0.1 V/s; 500 V DC on PMT. All samples were prepared on ITO glass by spin coating.

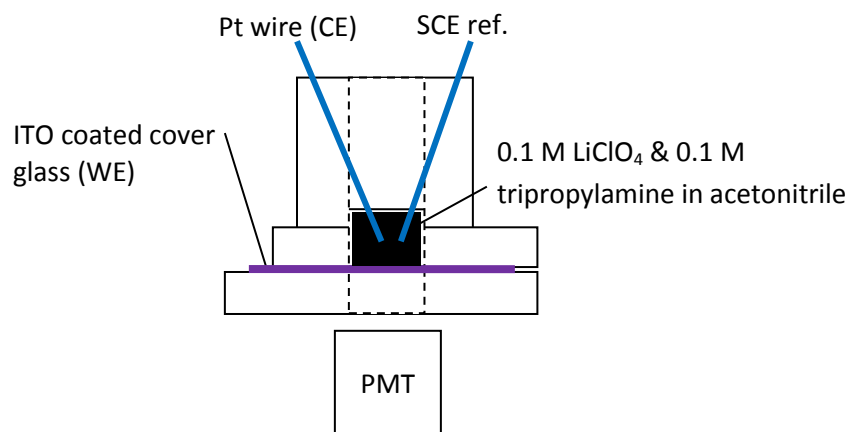

**Figure S2.** Typical ECL spectrum obtained from P3HT thin film collected using a spectrometer and CCD camera (Acton Spec-10:100B and Acton SP-2558, Princeton instruments) while ECL was generated from a P3HT coated thin film electrode using a bipotentiostat CHI 760C.

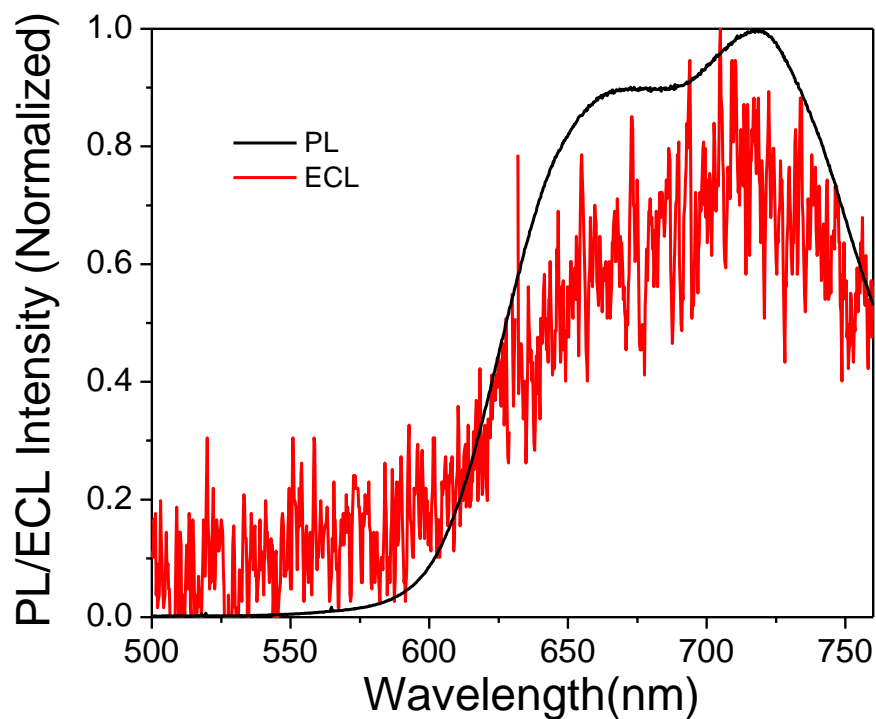

**Figure S3.** Energy alignment of redox species for charge injection and ECL generation.

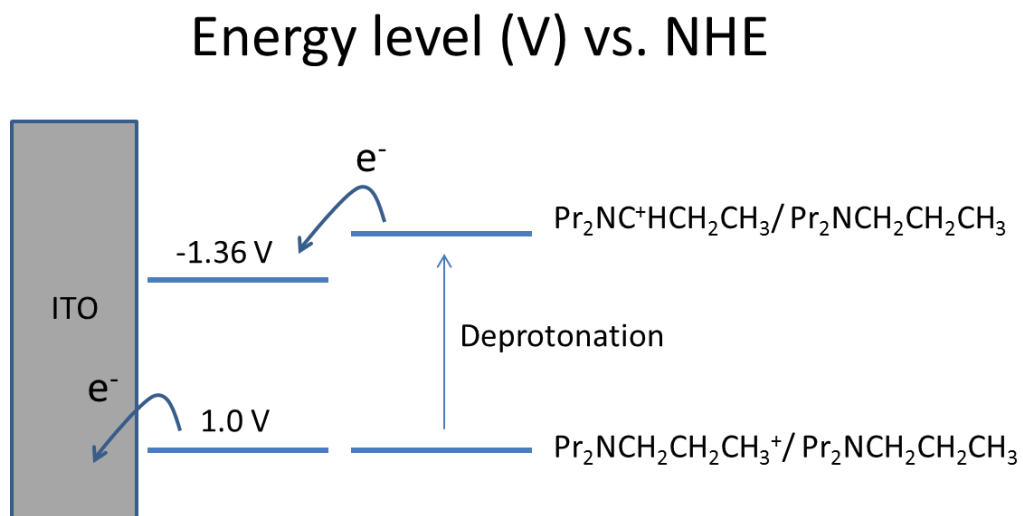

## Surface area calculations

$$\begin{aligned} \sigma_{\text{TiO}_2} &= n_{\text{NPs}} \sigma_{\text{NP}} \\ n_{\text{NPs}} &= \frac{\%_{\text{TiO}_2} m_{\text{film}}}{\rho_{\text{TiO}_2} V_{\text{NP}}} \\ \sigma_{\text{TiO}_2} &= \frac{\%_{\text{TiO}_2} m_{\text{film}}}{\rho_{\text{TiO}_2} V_{\text{NP}}} \sigma_{\text{NP}} = \frac{\%_{\text{TiO}_2} m_{\text{film}}}{\rho_{\text{TiO}_2}} \frac{4\pi r_{\text{NP}}^2}{\frac{4}{3}\pi r_{\text{NP}}^3} = \frac{3\%_{\text{TiO}_2} m_{\text{film}}}{\rho_{\text{TiO}_2} r_{\text{NP}}} \\ \rho_{\text{film}} &= \frac{m_{\text{film}}}{V_{\text{film}}} = \frac{m_{\text{film}}}{\frac{m_{\text{P3HT}}}{\rho_{\text{P3HT}}} + \frac{m_{\text{TiO}_2}}{\rho_{\text{TiO}_2}}} = \frac{m_{\text{film}}}{\left(\frac{\%_{\text{P3HT}}}{\rho_{\text{P3HT}}} + \frac{\%_{\text{TiO}_2}}{\rho_{\text{TiO}_2}}\right) m_{\text{film}}} = \frac{\rho_{\text{P3HT}} \rho_{\text{TiO}_2}}{\%_{\text{P3HT}} \rho_{\text{TiO}_2} + \%_{\text{TiO}_2} \rho_{\text{P3HT}}} \\ \rho_{\text{film}} &= \frac{\rho_{\text{P3HT}}}{\%_{\text{P3HT}} + \%_{\text{TiO}_2} \frac{\rho_{\text{P3HT}}}{\rho_{\text{TiO}_2}}} = \frac{\rho_{\text{P3HT}}}{\left(1 - \%_{\text{TiO}_2}\right) + \%_{\text{TiO}_2} \frac{\rho_{\text{P3HT}}}{\rho_{\text{TiO}_2}}} = \frac{\rho_{\text{P3HT}}}{1 + \left(\frac{\rho_{\text{P3HT}}}{\rho_{\text{TiO}_2}} - 1\right) \%_{\text{TiO}_2}} \\ \frac{\sigma_{\text{TiO}_2}}{V_{\text{film}}} &= \frac{\sigma_{\text{TiO}_2} \rho_{\text{film}}}{m_{\text{film}}} = \left(\frac{3\%_{\text{TiO}_2}}{\rho_{\text{TiO}_2} r_{\text{NP}}}\right) \left(\frac{\rho_{\text{P3HT}}}{1 + \left(\frac{\rho_{\text{P3HT}}}{\rho_{\text{TiO}_2}} - 1\right) \%_{\text{TiO}_2}}\right) = \frac{3 \frac{\rho_{\text{P3HT}}}{\rho_{\text{TiO}_2}} \%_{\text{TiO}_2}}{r_{\text{NP}} \left(1 + \left(\frac{\rho_{\text{P3HT}}}{\rho_{\text{TiO}_2}} - 1\right) \%_{\text{TiO}_2}\right)} = 8.5 \times 10^5 \text{ cm}^{-1} \left(\frac{\%_{\text{TiO}_2}}{1 - 0.72\%_{\text{TiO}_2}}\right) \end{aligned}$$

where  $\sigma_{\text{TiO}_2}$  is the total surface area of  $\text{TiO}_2$ ,

$V_{\text{film}}$  is the volume of the P3HT/ $\text{TiO}_2$  film,

$\rho_{\text{P3HT}}$  and  $\rho_{\text{TiO}_2}$  are the P3HT and densities,

$r_{\text{NP}}$  is the radius of the nanoparticles,

and  $\%_{\text{TiO}_2}$  is the fraction (by weight) of  $\text{TiO}_2$  in the film.

**Figure S4.** *J-V* characteristics of P3HT/TiO<sub>2</sub> hybrid with 80 wt% content of spherical-shaped TiO<sub>2</sub> nanoparticles solar cells.

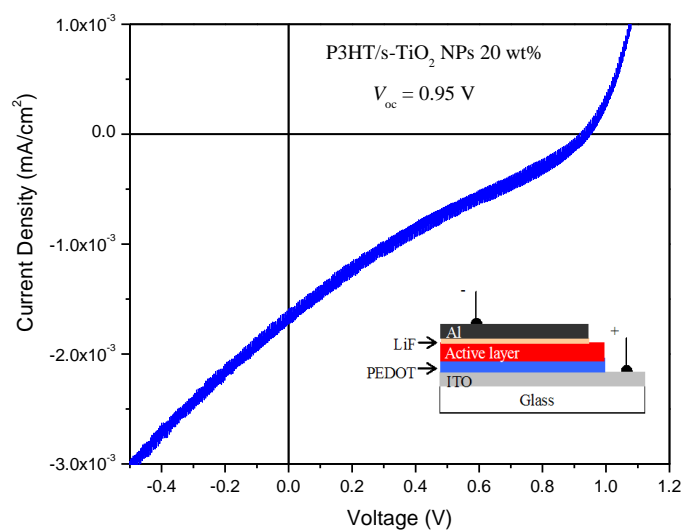

Supplement: c2cp43680a.pdf [file c2cp43680a.pdf]
